# Supplementary material
Source: publisher site journal article supplement (https://www.dovepress.com/article/470154)
Supplement: Supplementary file 1 [file get_supplementary_file.php]

**Urinary epinephrine sulfate can predict cardiovascular risk in moderate-to-severe OSA: A metabolomics-based study**

**Supplementary Materials**

**Supplementary Table S1 Identified different metabolites between moderate-to-severe OSA patients and controls**

| **Compound** | **Metabolite name** | **Formula** | **p value** | **q value** | **VIP** | **Fold Change** |
| --- | --- | --- | --- | --- | --- | --- |
| HMDB0001876 | Epinephrine sulfate | C9H13NO6S | 2.14E-05 | 0.009281014 | 2.10719 | 1.823053811 |
| C00627 | Pyridoxine phosphate | C8H12NO6P | 0.0003362 | 0.086926886 | 1.12402 | 1.789773509 |
| HMDB0031954 | 3-Methyl-3-butenyl apiosyl-(1->6)-glucoside | C16H28O10 | 0.000539082 | 0.147966420 | 3.72937 | 0.568870256 |
| HMDB0015074 | Meclofenamic acid | C14H11Cl2NO2 | 0.001074622 | 0.148673036 | 1.82372 | 1.613243633 |
| C17972 | Fortimicin AO | C13H27N3O8 | 0.001973677 | 0.166168977 | 2.01429 | 0.241453144 |
| HMDB0029219 | Urolithin D | C13H8O6 | 0.002410467 | 0.247551166 | 2.23323 | 0.497699179 |
| HMDB0035178 | 6-Acetyl-2,3-dihydro-2-(hydroxymethyl)-4(1H)-pyridinone | C8H11NO3 | 0.003067672 | 0.429473534 | 1.79408 | 0.579962887 |
| HMDB0032381 | 2-Methoxy-(3 or 5 or 6)-isopropylpyrazine | C8H12N2O | 0.003306094 | 0.504502754 | 1.29726 | 0.453886569 |
| HMDB0030148 | Prehumulinic acid | C16H24O4 | 0.003431518 | 0.507201481 | 3.00497 | 0.431872836 |
|  | dopaxanthin quinone | C18H16N2O8 | 0.004084496 | 0.512531076 | 2.15244 | 1.240267209 |
| HMDB0030277 | Dihydromaleimide beta-D-glucoside | C10H15NO7 | 0.004200307 | 0.524205579 | 1.88022 | 0.791365324 |
| C00119 | Phosphoribosyl pyrophosphate | C5H13O14P3 | 0.006467365 | 0.591823168 | 1.19717 | 1.516512133 |
| HMDB0032956 | 2-O-p-Coumaroyltartronic acid | C12H10O7 | 0.007187378 | 0.603261512 | 2.21818 | 1.2683431 |
| HMDB0035867 | 11,13-Dihydrotaraxinic acid glucosyl ester | C21H30O9 | 0.007862682 | 0.618956018 | 2.20692 | 0.508087849 |
| C02335 | beta-alanyl-CoA | C24H41N8O17P3S | 0.008470745 | 0.724954548 | 1.58387 | 2.3360836 |
| HMDB0006029 | N-Acetylglutamine | C7H12N2O4 | 0.008894501 | 0.745575924 | 1.84569 | 1.431878043 |
| HMDB0014659 | Albendazole | C12H15N3O2S | 0.010927617 | 0.804333918 | 1.04422 | 0.717774368 |
| HMDB0030876 | Bis(methylthio) selenide | C2H6S2Se | 0.011101347 | 0.804333918 | 7.52229 | 0.802343765 |
| HMDB0033222 | (1R,3S,4S,6R)-6,9-Dihydroxyfenchone 6-O-b-D-glucoside | C16H26O8 | 0.01151441 | 0.908940969 | 2.60569 | 1.449504731 |
| HMDB0010338 | 11-Oxo-androsterone glucuronide | C25H36O9 | 0.011691123 | 0.911757178 | 2.65581 | 0.765232595 |
| HMDB0036860 | Ginkgolide C | C20H24O11 | 0.012619118 | 0.911757178 | 1.80693 | 0.239822575 |
| HMDB0013240 | Indoleacetyl glutamine | C15H17N3O4 | 0.012780497 | 0.911757178 | 6.55854 | 0.583709319 |
| HMDB0059622 | 4-Methylumbelliferone | C10H8O3 | 0.013733503 | 0.911757178 | 2.51152 | 1.240853034 |
| HMDB0014702 | Benzthiazide | C15H14ClN3O4S3 | 0.016122649 | 0.911757178 | 1.3695 | 1.247132141 |
| HMDB0012622 | 2-Hydroxyestrone sulfate | C18H22O6S | 0.016613207 | 0.911757178 | 1.64267 | 0.540152678 |
| HMDB0031577 | Berteroin | C7H13NS2 | 0.016655041 | 0.911757178 | 2.15681 | 0.711071249 |
| HMDB0015673 | Carglumic acid | C6H10N2O5 | 0.01703602 | 0.911757178 | 1.92618 | 0.730809794 |
| HMDB0001422 | 3-Hydroxy-N6,N6,N6-trimethyl-L-lysine | C9H21N2O3+ | 0.017570474 | 0.911757178 | 1.32751 | 0.741961451 |
| HMDB0029862 | Cyromazine | C6H10N6 | 0.021091994 | 0.911757178 | 1.26047 | 0.620990731 |
| HMDB0033622 | Cabbage identification factor 2 | C15H12N4O3S | 0.021871623 | 0.911757178 | 1.41176 | 1.762131278 |
| HMDB0015264 | Pioglitazone | C19H20N2O3S | 0.022439583 | 0.911757178 | 1.05578 | 0.481896992 |
| HMDB0015592 | Tetrabenazine | C19H27NO3 | 0.023576483 | 0.911757178 | 2.1123 | 0.648554391 |
| HMDB0000014 | Deoxycytidine | C9H13N3O4 | 0.023968677 | 0.911757178 | 1.01861 | 0.774613925 |
| HMDB0014696 | Perflutren | C3F8 | 0.024182612 | 0.911757178 | 1.03149 | 2.870617092 |
| C11300 | Soraphen A | C29H44O8 | 0.024516261 | 0.911757178 | 1.63003 | 1.252442764 |
| HMDB0030557 | Tracheloside | C27H34O12 | 0.024893179 | 0.911757178 | 1.3676 | 0.113475522 |
| HMDB0015493 | Aminophenazone | C13H17N3O | 0.025960883 | 0.911757178 | 15.1318 | 0.662289982 |
| C00059 | Sulfuric acid | H2O4S | 0.02664308 | 0.911757178 | 6.2643 | 0.781784301 |
| HMDB0031796 | Isofenphos | C15H24NO4PS | 0.026682265 | 0.911757178 | 1.0337 | 1.223122118 |
| HMDB0029941 | D-Apiose | C5H10O5 | 0.02731163 | 0.911757178 | 10.4943 | 0.796319128 |
| HMDB0061086 | N-Didesmethyl-tamoxifen | C24H25NO | 0.028553147 | 0.911757178 | 2.92545 | 0.633182806 |
| HMDB0014798 | Metaxalone | C12H15NO3 | 0.028649581 | 0.911757178 | 1.63865 | 1.867145485 |
| HMDB0031126 | 3,4-Dimethyl-5-pentyl-2-furanundecanoic acid | C22H38O3 | 0.028811529 | 0.911757178 | 1.44659 | 0.410609654 |
| HMDB0013655 | O-Arachidonoyl Ethanolamine | C22H37NO2 | 0.029601937 | 0.911757178 | 1.56335 | 0.536281327 |
| HMDB0035438 | Promucosine | C20H21NO5 | 0.032457799 | 0.911757178 | 1.11323 | 1.205453351 |
| HMDB0036836 | Cascarillin | C22H32O7 | 0.033185351 | 0.911757178 | 1.58575 | 0.538464285 |
| HMDB0038458 | N,N'-Bis(gamma-glutamyl)cystine | C16H26N4O10S2 | 0.033308743 | 0.965296797 | 1.61091 | 1.244380637 |
| HMDB0034942 | Geniposidic acid | C16H22O10 | 0.033344218 | 1.000000000 | 2.27695 | 3.357457028 |
| HMDB0000998 | dCTP | C9H16N3O13P3 | 0.03452067 | 1.000000000 | 1.11233 | 2.277573206 |
| HMDB0010357 | Tetrahydroaldosterone-3-glucuronide | C27H40O11 | 0.035557877 | 1.000000000 | 1.7151 | 0.723178237 |
| C20248 | 7-carboxy-7-deazaguanine | C7H6N4O3 | 0.036087551 | 1.000000000 | 9.06492 | 2.37897127 |
| HMDB0035184 | Semilicoisoflavone B | C20H16O6 | 0.036199745 | 1.000000000 | 1.48284 | 2.626458896 |
| C06882 | Cefonicid monosodium | C18H17N6NaO8S3 | 0.036627871 | 1.000000000 | 1.34956 | 1.593638934 |
| HMDB0002577 | Cholic acid glucuronide | C30H48O11 | 0.037481533 | 1.000000000 | 4.93041 | 0.50009414 |
| HMDB0031876 | Prenyl glucoside | C11H20O6 | 0.038258415 | 1.000000000 | 1.02947 | 0.2217704 |
| HMDB0003193 | Testosterone glucuronide | C25H36O8 | 0.039892573 | 1.000000000 | 1.84971 | 0.798093266 |
| HMDB0029776 | Dhurrin 6'-glucoside | C20H27NO12 | 0.043209308 | 1.000000000 | 1.07397 | 0.086520247 |
|  | ELLIPTICINE | C17H14N2 | 0.044396926 | 1.000000000 | 6.206 | 0.579215586 |
| HMDB0032216 | Diethylenetriamine crosslinked with epichlorohydrin | C14H22ClNO | 0.04598396 | 1.000000000 | 3.18229 | 0.724762024 |
| HMDB0035360 | N-Methyl-1-deoxynojirimycin | C7H15NO4 | 0.046139908 | 1.000000000 | 1.41627 | 0.67411213 |
| C16609 | didemethylcitalopram | C18H17FN2O | 0.046279331 | 1.000000000 | 1.21191 | 0.605057973 |
| HMDB0015133 | Frovatriptan | C14H17N3O | 0.049648857 | 1.000000000 | 6.80532 | 0.720118229 |
| HMDB0004985 | N6-beta-Aspartyllysine | C10H19N3O5 | 0.049703805 | 1.000000000 | 1.22175 | 0.437384151 |
| HMDB0028979 | Methionyl-Methionine | C10H20N2O3S2 | 0.049758327 | 1.000000000 | 5.32021 | 0.1569103 |
| C17644 | ursocholic acid | C24H40O5 | 0.049783522 | 1.000000000 | 1.13053 | 0.478482078 |

**Supplementary Table S2 The ROC analysis results of differential metabolites**

| **Metabolite name** | AUC | T-tests | Log2FC |
| --- | --- | --- | --- |
| Epinephrine sulfate | 0.88312 | 0.0000719 | -0.86636 |
| Meclofenamic acid | 0.86688 | 0.000094 | -0.68996 |
| Pyridoxine phosphate | 0.85065 | 0.0036214 | -0.83978 |
| 3-Methyl-3-butenyl apiosyl-(1->6)-glucoside | 0.84091 | 0.000895 | 0.81383 |
| 11,13-Dihydrotaraxinic acid glucosyl ester | 0.80844 | 0.0072471 | 0.97685 |
| Prehumulinic acid | 0.80519 | 0.000993 | 1.2113 |
| Fortimicin AO | 0.7987 | 0.0082443 | 2.0502 |
| Urolithin D | 0.78247 | 0.0011642 | 1.0067 |
| 2-Methoxy-(3 or 5 or 6)-isopropylpyrazine | 0.77597 | 0.0016721 | 1.1396 |
| Dihydromaleimide beta-D-glucoside | 0.77273 | 0.0056532 | 0.33758 |
| 3-Hydroxy-N6,N6,N6-trimethyl-L-lysine | 0.76299 | 0.030262 | 0.43058 |
| 6-Acetyl-2,3-dihydro-2-(hydroxymethyl)-4(1H)-pyridinone | 0.75649 | 0.0010694 | 0.78597 |
| O-Arachidonoyl Ethanolamine | 0.75649 | 0.0052614 | 0.89828 |
| Phosphoribosyl pyrophosphate | 0.75325 | 0.011277 | -0.60076 |
| Pioglitazone | 0.75325 | 0.0099631 | 1.0516 |
| beta-alanyl-CoA | 0.75 | 0.049951 | -1.2204 |
| N6-beta-Aspartyllysine | 0.74675 | 0.014673 | 1.186 |
| Albendazole | 0.74351 | 0.012784 | 0.4784 |
| Cyromazine | 0.74351 | 0.039975 | 0.68736 |
| N-Acetylglutamine | 0.74026 | 0.013582 | -0.51791 |
| (1R,3S,4S,6R)-6,9-Dihydroxyfenchone 6-O-b-D-glucoside | 0.73701 | 0.014561 | -0.53556 |
| 11-Oxo-androsterone glucuronide | 0.73377 | 0.014464 | 0.38603 |
| Tracheloside | 0.73377 | 0.18128 | 3.1324 |
| Perflutren | 0.73052 | 0.083151 | -1.5214 |
| dopaxanthin quinone | 0.73052 | 0.0060583 | -0.31065 |
| Soraphen A | 0.72727 | 0.18804 | -0.32474 |
| N,N'-Bis(gamma-glutamyl)cystine | 0.72727 | 0.034018 | -0.31543 |
| 2-O-p-Coumaroyltartronic acid | 0.72078 | 0.0113 | -0.34295 |
| Benzthiazide | 0.72078 | 0.017318 | -0.31861 |
| D-Apiose | 0.71429 | 0.025073 | 0.32858 |
| Tetrahydroaldosterone-3-glucuronide | 0.71429 | 0.02317 | 0.46758 |
| 3,4-Dimethyl-5-pentyl-2-furanundecanoic acid | 0.71429 | 0.025159 | 1.2835 |
| Ginkgolide C | 0.71429 | 0.16235 | 2.0598 |
| Semilicoisoflavone B | 0.71104 | 0.068606 | -1.3931 |
| Metaxalone | 0.71104 | 0.077528 | -0.90083 |
| Sulfuric acid | 0.71104 | 0.014514 | 0.35516 |
| Cholic acid glucuronide | 0.71104 | 0.026434 | 0.99973 |
| Berteroin | 0.71104 | 0.014995 | 0.49193 |
| Tetrabenazine | 0.71104 | 0.023599 | 0.6247 |
| Testosterone glucuronide | 0.70779 | 0.057363 | 0.32537 |
| Aminophenazone | 0.70779 | 0.017408 | 0.59447 |
| Cabbage identification factor 2 | 0.70455 | 0.0428 | -0.81732 |
| Bis(methylthio) selenide | 0.70455 | 0.0089112 | 0.31771 |
| Carglumic acid | 0.70455 | 0.015251 | 0.45243 |
| N-Methyl-1-deoxynojirimycin | 0.7013 | 0.039741 | 0.56894 |
| Indoleacetyl glutamine | 0.7013 | 0.0069559 | 0.77668 |
| didemethylcitalopram | 0.7013 | 0.014153 | 0.72485 |
| dCTP | 0.69805 | 0.10948 | -1.1874 |
| Deoxycytidine | 0.69805 | 0.01526 | 0.36845 |
| N-Didesmethyl-tamoxifen | 0.69805 | 0.015219 | 0.65931 |
| 7-carboxy-7-deazaguanine | 0.69481 | 0.055494 | -1.2503 |
| 2-Hydroxyestrone sulfate | 0.69481 | 0.0077406 | 0.88856 |
| ursocholic acid | 0.69481 | 0.12201 | 1.0595 |
| 4-Methylumbelliferone | 0.69481 | 0.016546 | -0.31133 |
| Promucosine | 0.68831 | 0.043206 | -0.26958 |
| Dhurrin 6'-glucoside | 0.68506 | 0.14029 | 3.5239 |
| Diethylenetriamine crosslinked with epichlorohydrin | 0.68182 | 0.044471 | 0.46442 |
| Cascarillin | 0.67857 | 0.13653 | 0.89119 |
| Cefonicid monosodium | 0.67532 | 0.095389 | -0.67206 |
| Geniposidic acid | 0.67208 | 0.11706 | -1.7466 |
| Methionyl-Methionine | 0.66558 | 0.094993 | 2.672 |
| ELLIPTICINE | 0.66234 | 0.066909 | 0.78783 |
| Frovatriptan | 0.65909 | 0.020525 | 0.47369 |
| Prenyl glucoside | 0.64286 | 0.14903 | 2.1673 |
| Isofenphos | 0.62013 | 0.074842 | -0.29057 |

**Supplementary Table S3 The mediation analysis results in the effect of epinephrine sulfate (exposure) on Framingham cardiovascular risk (outcome)**

| Mediators | | Effect (SE) | 95%CI | *P*-value |
| --- | --- | --- | --- | --- |
| AHI | Total effect | 0.0029 (0.0010) | (0.0010, 0.0048) | 0.0047 |
| Direct effect | 0.0025 (0.0012) | (0.0000, 0.0050) | 0.0483 |
| Indirect effect | 0.0004 (0.0007) | (-0.0008, 0.0020) | - |
| Effect of exposure on mediators | 0.0649 (0.0146) | (0.0351, 0.0947) | 0.0001 |
| Effect of mediators on outcome | 0.0058 (0.0116) | (-0.0179, 0.0295) | 0.6227 |
| ODI | Total effect | 0.0029 (0.0010) | (0.0010, 0.0048) | 0.0047 |
| Direct effect | 0.0024 (0.0013) | (-0.0002, 0.0050) | 0.0722 |
| Indirect effect | 0.0005 (0.0008) | (-0.0009, 0.0021) | - |
| Effect of exposure on mediators | 0.0681 (0.0137) | (0.0401, 0.0960) | <0.0001 |
| Effect of mediators on outcome | 0.0075 (0.0124) | (-0.0177, 0.0327) | 0.5489 |
| MeanSpO2 | Total effect | 0.0029 (0.0010) | (0.0010, 0.0048) | 0.0047 |
| Direct effect | 0.0030 (0.0011) | (0.0007, 0.0053) | 0.0128 |
| Indirect effect | -0.0001 (0.0006) | (-0.0011, 0.0012) | - |
| Effect of exposure on mediators | -0.0067 (0.0020) | (-0.0107, -0.0027) | 0.0019 |
| Effect of mediators on outcome | 0.0128 (0.0868) | (-0.1642, 0.1899) | 0.8834 |
| LowestSpO2 | Total effect | 0.0029 (0.0010) | (0.0010, 0.0048) | 0.0047 |
| Direct effect | 0.0027 (0.0012) | (0.0003, 0.0051) | 0.0316 |
| Indirect effect | 0.0002 (0.0007) | (-0.0009, 0.0017) | - |
| Effect of exposure on mediators | -0.0246 (0.0061) | (-0.0370, -0.0122) | 0.0003 |
| Effect of mediators on outcome | -0.0088 (0.0280) | (-0.0659, 0.0483) | 0.7548 |
| T90% | Total effect | 0.0029 (0.0010) | (0.0010, 0.0048) | 0.0047 |
| Direct effect | 0.0025 (0.0011) | (0.0004, 0.0047) | 0.0225 |
| Indirect effect | 0.0003 (0.0006) | (-0.0006, 0.0017) | - |
| Effect of exposure on mediators | 0.0255 (0.0096) | (0.0059, 0.0451) | 0.0123 |
| Effect of mediators on outcome | 0.0137 (0.0176) | (-0.0222, 0.0496) | 0.4415 |
| SBP | Total effect | 0.0029 (0.0010) | (0.0010, 0.0048) | 0.0047 |
| Direct effect | 0.0021 (0.0010) | (0.0001, 0.0041) | 0.0420 |
| Indirect effect | 0.0008 (0.0004) | (0.0002, 0.0018) | - |
| Effect of exposure on mediators | 0.0194 (0.0082) | (0.0027, 0.0362) | 0.0244 |
| Effect of mediators on outcome | 0.0423 (0.0193) | (0.0029, 0.0817) | 0.0364 |
| DBP | Total effect | 0.0029 (0.0010) | (0.0010, 0.0048) | 0.0047 |
| Direct effect | 0.0022 (0.0010) | (0.0001, 0.0042) | 0.0367 |
| Indirect effect | 0.0007 (0.0004) | (0.0001, 0.0018) | - |
| Effect of exposure on mediators | 0.0148 (0.0061) | (0.0024, 0.0272) | 0.0211 |
| Effect of mediators on outcome | 0.0475 (0.0266) | (-0.0069, 0.1018) | 0.0848 |
| TC | Total effect | 0.0029 (0.0010) | (0.0010, 0.0048) | 0.0047 |
| Direct effect | 0.0027 (0.0009) | (0.0008, 0.0046) | 0.0066 |
| Indirect effect | 0.0002 (0.0004) | (-0.0004, 0.0010) | - |
| Effect of exposure on mediators | 0.0004 (0.0007) | (-0.0010, 0.0019) | 0.5270 |
| Effect of mediators on outcome | 0.3829 (0.2346) | (-0.0956, 0.8614) | 0.1128 |
| AI@75 | Total effect | 0.0029 (0.0010) | (0.0010, 0.0048) | 0.0047 |
| Direct effect | 0.0025 (0.0010) | (0.0004, 0.0046) | 0.0212 |
| Indirect effect | 0.0004 (0.0004) | (-0.0002, 0.0015) | - |
| Effect of exposure on mediators | 0.0223 (0.0093) | (0.0034, 0.0412) | 0.0222 |
| Effect of mediators on outcome | 0.0168 (0.0181) | (-0.0202, 0.0538) | 0.3617 |

**Abbreviations**: AHI, apnea-hypopnea index; AI@75, augmentation index normalized to a heart rate of 75 bpm; BMI, body mass index; CI, confidence interval; DBP, diastolic blood pressure; ODI, oxygen desaturation index; OSA, obstructive sleep apnea; SBP, systolic blood pressure; SE, standard error; SpO2, peripheral blood oxygen saturation; TC, total serum cholesterol; T90%, percentage of cumulative time with oxygen saturation less than 90%.

**Supplementary Table S4 The mediation analysis results in the effect of epinephrine sulfate (exposure) on AI@75 (outcome)**

| Mediators | | Effect (SE) | 95%CI | *P*-value |
| --- | --- | --- | --- | --- |
| AHI | Total effect | 0.0223 (0.0093) | (0.0034, 0.0412) | 0.0222 |
| Direct effect | 0.0120 (0.0116) | (-0.0116, 0.0357) | 0.3073 |
| Indirect effect | 0.0103 (0.0102) | (-0.0078, 0.0323) | - |
| Effect of exposure on mediators | 0.0649 (0.0146) | (0.0351, 0.0947) | 0.0001 |
| Effect of mediators on outcome | 0.1584 (0.1104) | (-0.0667, 0.3835) | 0.0763 |
| ODI | Total effect | 0.0223 (0.0093) | (0.0034, 0.0412) | 0.0222 |
| Direct effect | 0.0086 (0.0120) | (-0.0158, 0.0330) | 0.4777 |
| Indirect effect | 0.0137 (0.0113) | (-0.0083, 0.0362) | - |
| Effect of exposure on mediators | 0.0681 (0.0137) | (0.0401, 0.0960) | <0.0001 |
| Effect of mediators on outcome | 0.2015 (0.1161) | (-0.0352, 0.4382) | 0.0924 |
| MeanSpO2 | Total effect | 0.0223 (0.0093) | (0.0034, 0.0412) | 0.0222 |
| Direct effect | 0.0208 (0.0110) | (-0.0016, 0.0432) | 0.0678 |
| Indirect effect | 0.0015 (0.0069) | (-0.0150, 0.0121) | - |
| Effect of exposure on mediators | -0.0067 (0.0020) | (-0.0107, -0.0027) | 0.0019 |
| Effect of mediators on outcome | -0.2308 (0.8477) | (-1.9598, 1.4981) | 0.7872 |
| LowestSpO2 | Total effect | 0.0223 (0.0093) | (0.0034, 0.0412) | 0.0222 |
| Direct effect | 0.0212 (0.0116) | (-0.0025, 0.0448) | 0.0776 |
| Indirect effect | 0.0012 (0.0066) | (-0.0133, 0.0131) | - |
| Effect of exposure on mediators | -0.0246 (0.0061) | (-0.0370, -0.0122) | 0.0003 |
| Effect of mediators on outcome | -0.0473 (0.2740) | (-0.6061, 0.5116) | 0.8642 |
| T90% | Total effect | 0.0223 (0.0093) | (0.0034, 0.0412) | 0.0222 |
| Direct effect | 0.0181 (0.0103) | (-0.0029, 0.0390) | 0.0885 |
| Indirect effect | 0.0043 (0.0050) | (-0.0054, 0.0162) | - |
| Effect of exposure on mediators | 0.0255 (0.0096) | (0.0059, 0.0451) | 0.0123 |
| Effect of mediators on outcome | 0.1676 (0.1709) | (-0.1810, 0.5162) | 0.3344 |
| SBP | Total effect | 0.0223 (0.0093) | (0.0034, 0.0412) | 0.0222 |
| Direct effect | 0.0107 (0.0087) | (-0.0070, 0.0284) | 0.2259 |
| Indirect effect | 0.0116 (0.0056) | (0.0023, 0.0241) | - |
| Effect of exposure on mediators | 0.0194 (0.0082) | (0.0027, 0.0362) | 0.0244 |
| Effect of mediators on outcome | 0.5978 (0.1722) | (0.2466, 0.9491) | 0.0015 |
| DBP | Total effect | 0.0223 (0.0093) | (0.0034, 0.0412) | 0.0222 |
| Direct effect | 0.0084 (0.0081) | (-0.0080, 0.0249) | 0.3052 |
| Indirect effect | 0.0139 (0.0055) | (0.0032, 0.0249) | - |
| Effect of exposure on mediators | 0.0148 (0.0061) | (0.0024, 0.0272) | 0.0211 |
| Effect of mediators on outcome | 0.9407 (0.2150) | (0.5021, 1.3793) | 0.0001 |
| TC | Total effect | 0.0223 (0.0093) | (0.0034, 0.0412) | 0.0222 |
| Direct effect | 0.0233 (0.0094) | (0.0042, 0.0424) | 0.0185 |
| Indirect effect | -0.0010 (0.0029) | (-0.0091, 0.0027) | - |
| Effect of exposure on mediators | -2.1671 (2.3577) | (-6.9758, 2.6416) | 0.3651 |
| Effect of mediators on outcome | 0.0004 (0.0007) | (-0.0010, 0.0019) | 0.5270 |

**Abbreviations**: AHI, apnea-hypopnea index; AI@75, augmentation index normalized to a heart rate of 75 bpm; BMI, body mass index; CI, confidence interval; DBP, diastolic blood pressure; ODI, oxygen desaturation index; OSA, obstructive sleep apnea; SBP, systolic blood pressure; SE, standard error; SpO2, peripheral blood oxygen saturation; TC, total serum cholesterol; T90%, percentage of cumulative time with oxygen saturation less than 90%.

**
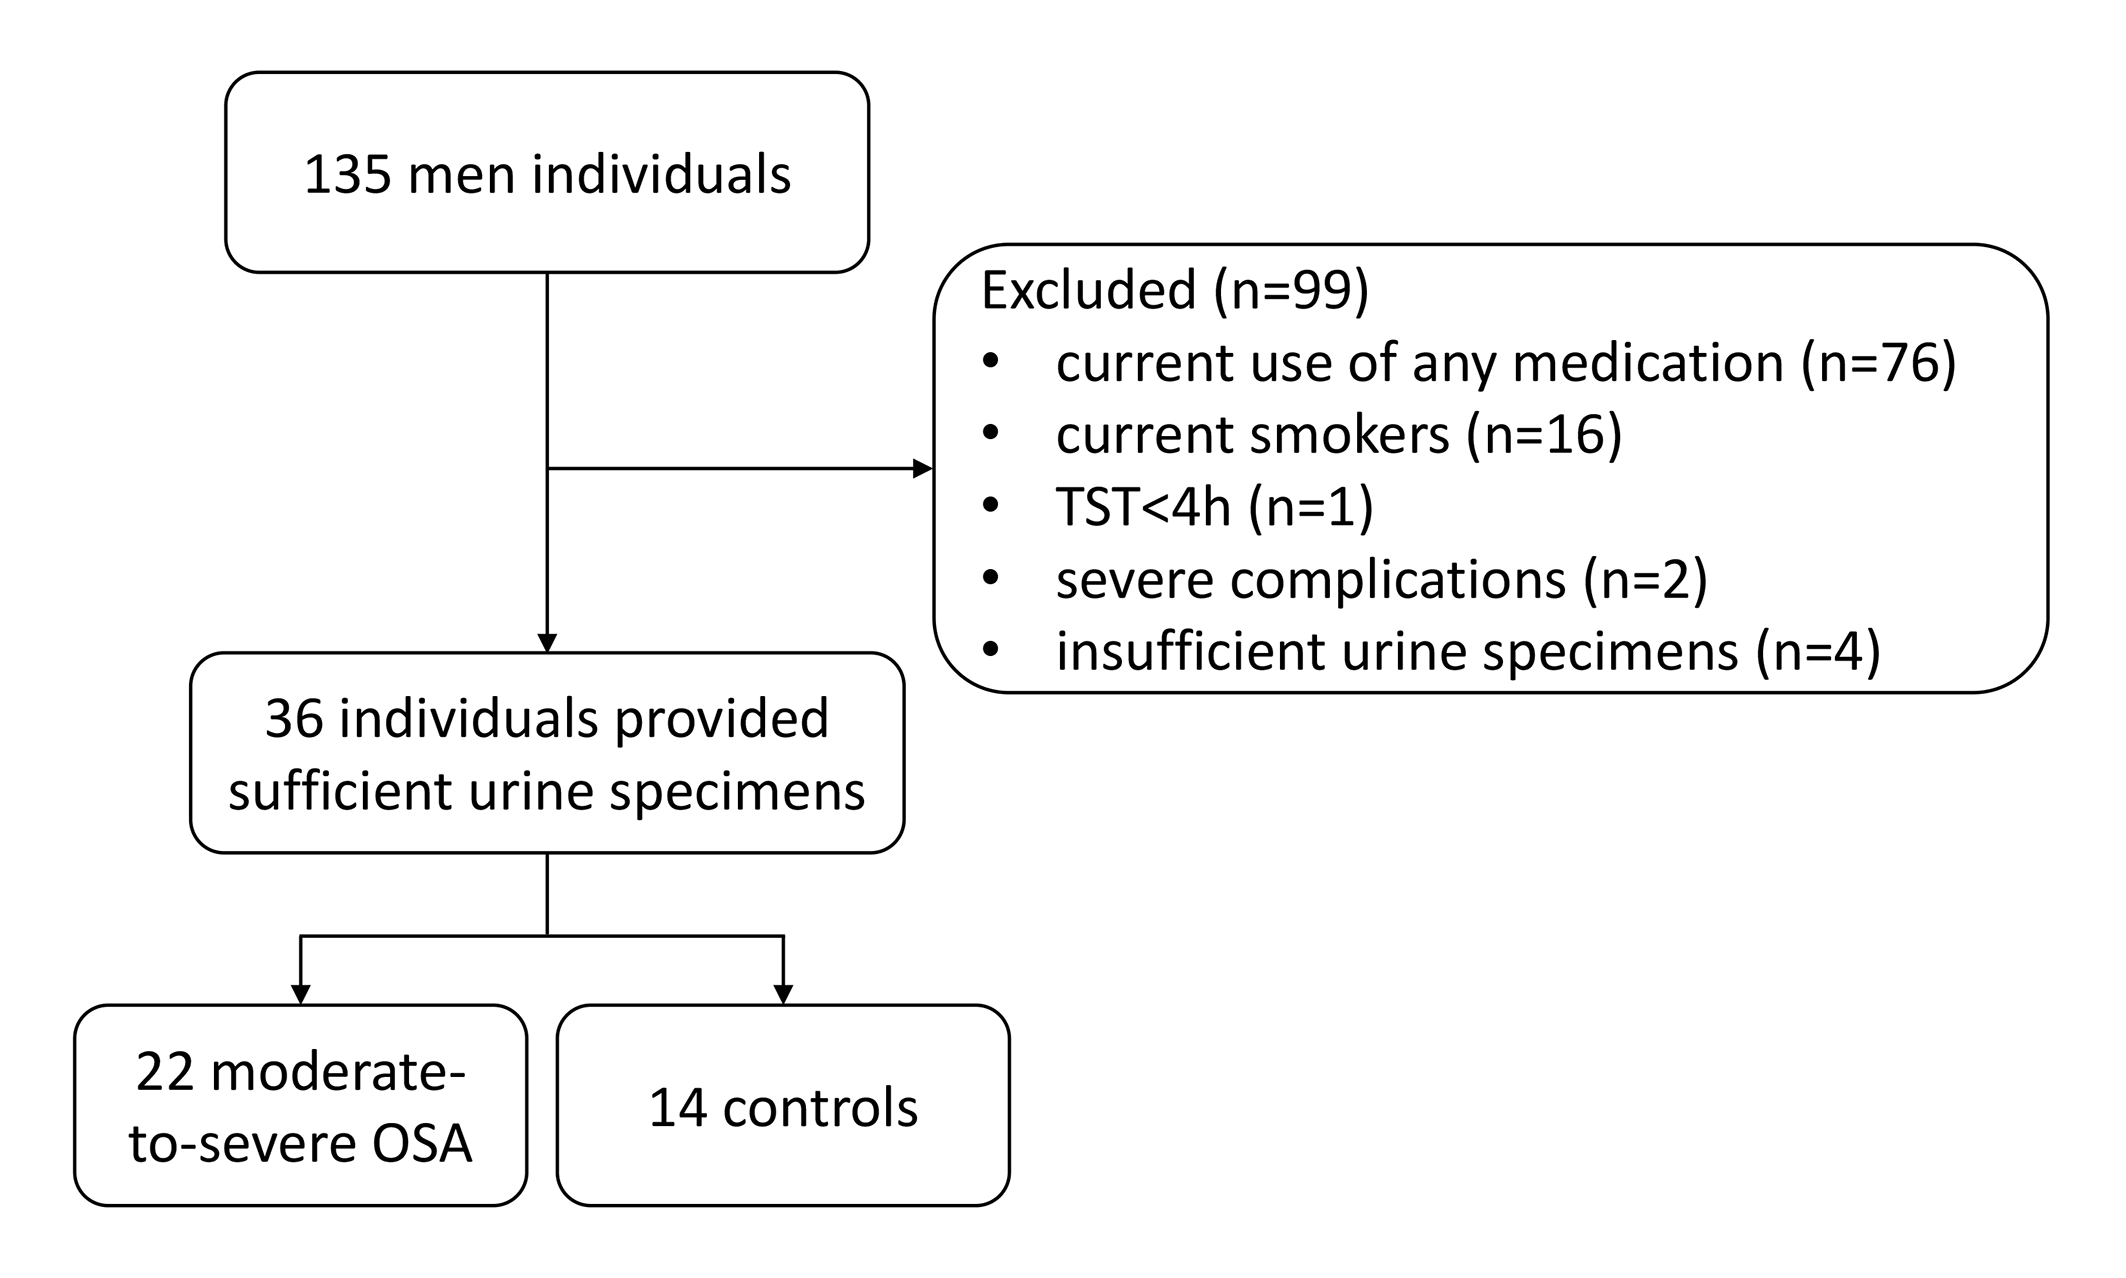
**

**Supplementary Figure S1:** Flowchart of the participant selection process.

**Abbreviations**: OSA, obstructive sleep apnea; TST, total sleep time.


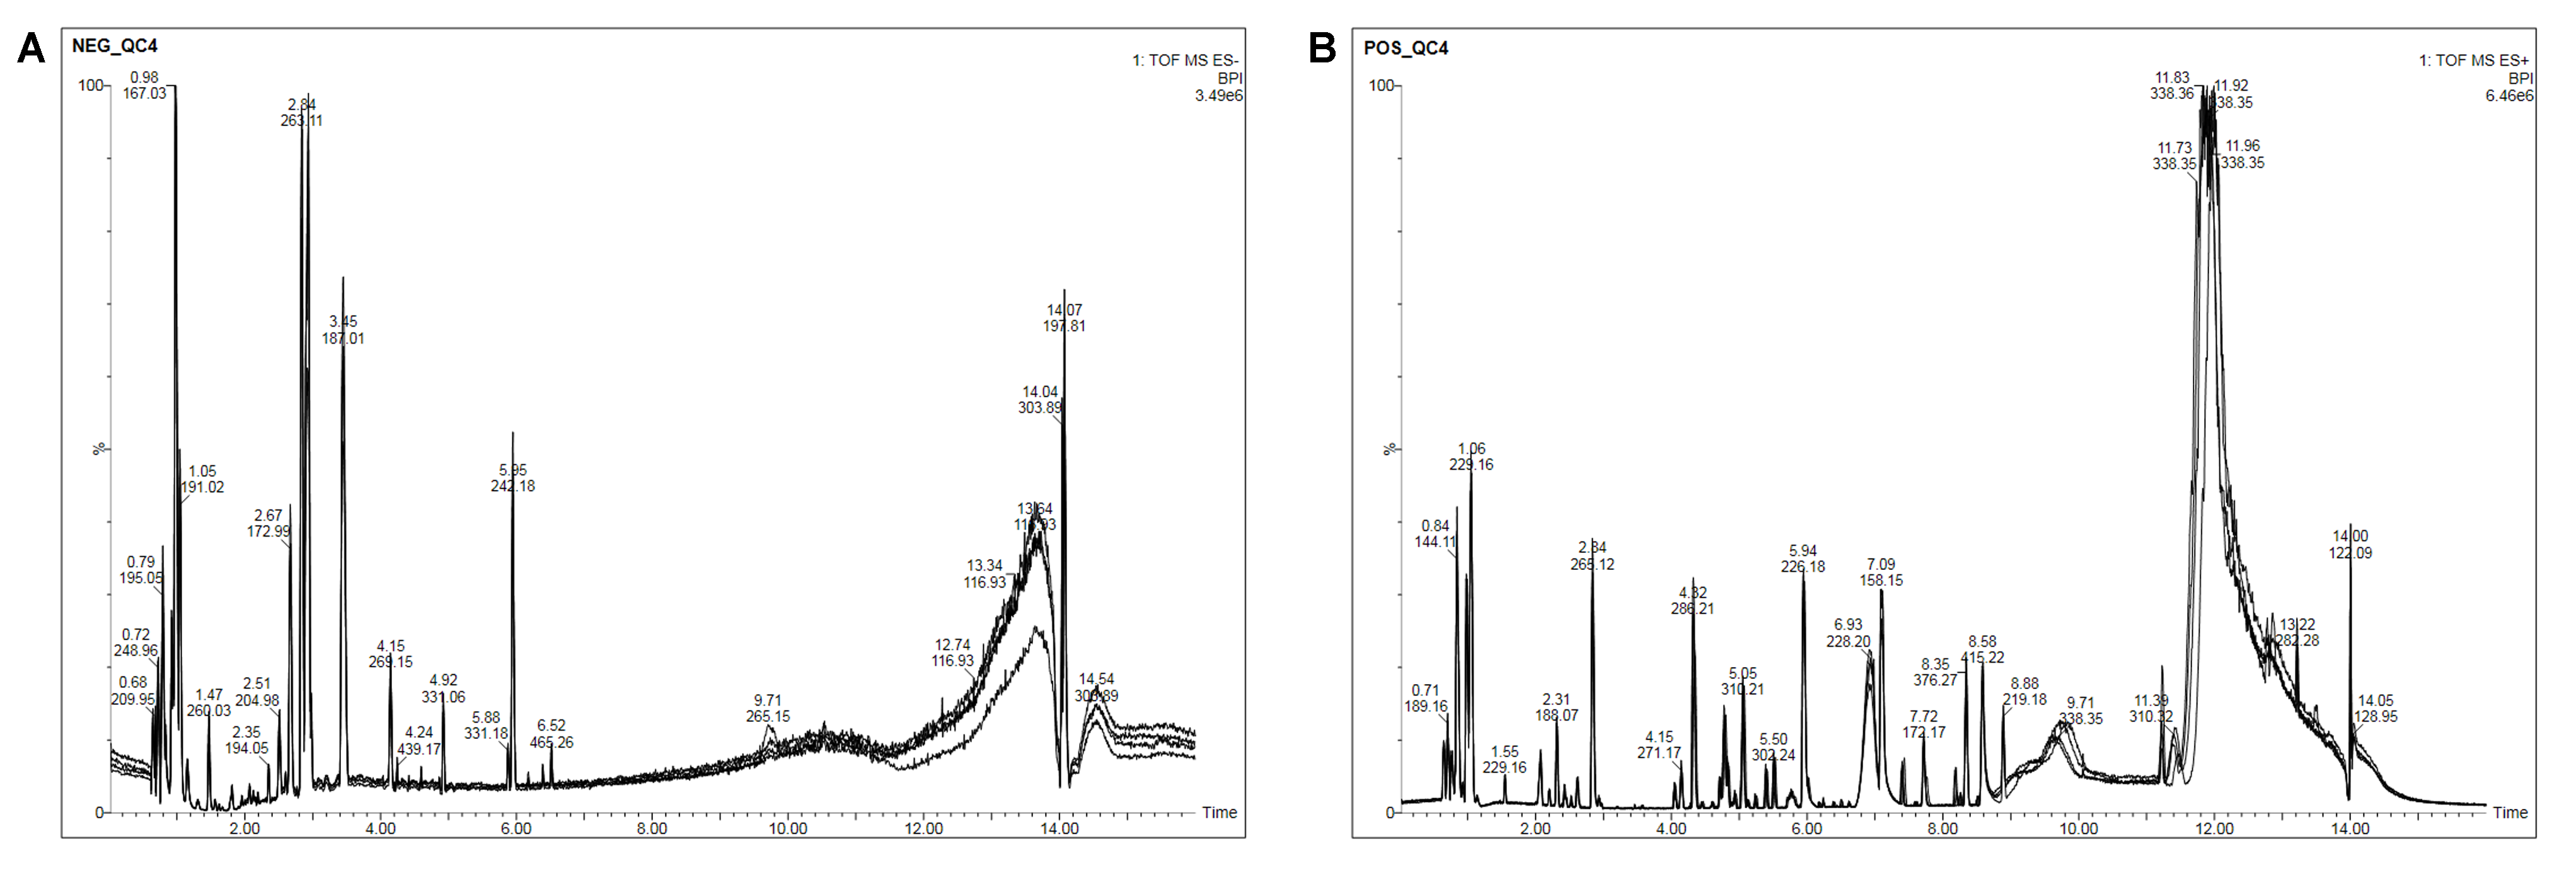


**Supplementary Figure S2:** The base peak chromatograms for quality control samples in the negative-ion (A) and positive-ion modes (B).

**
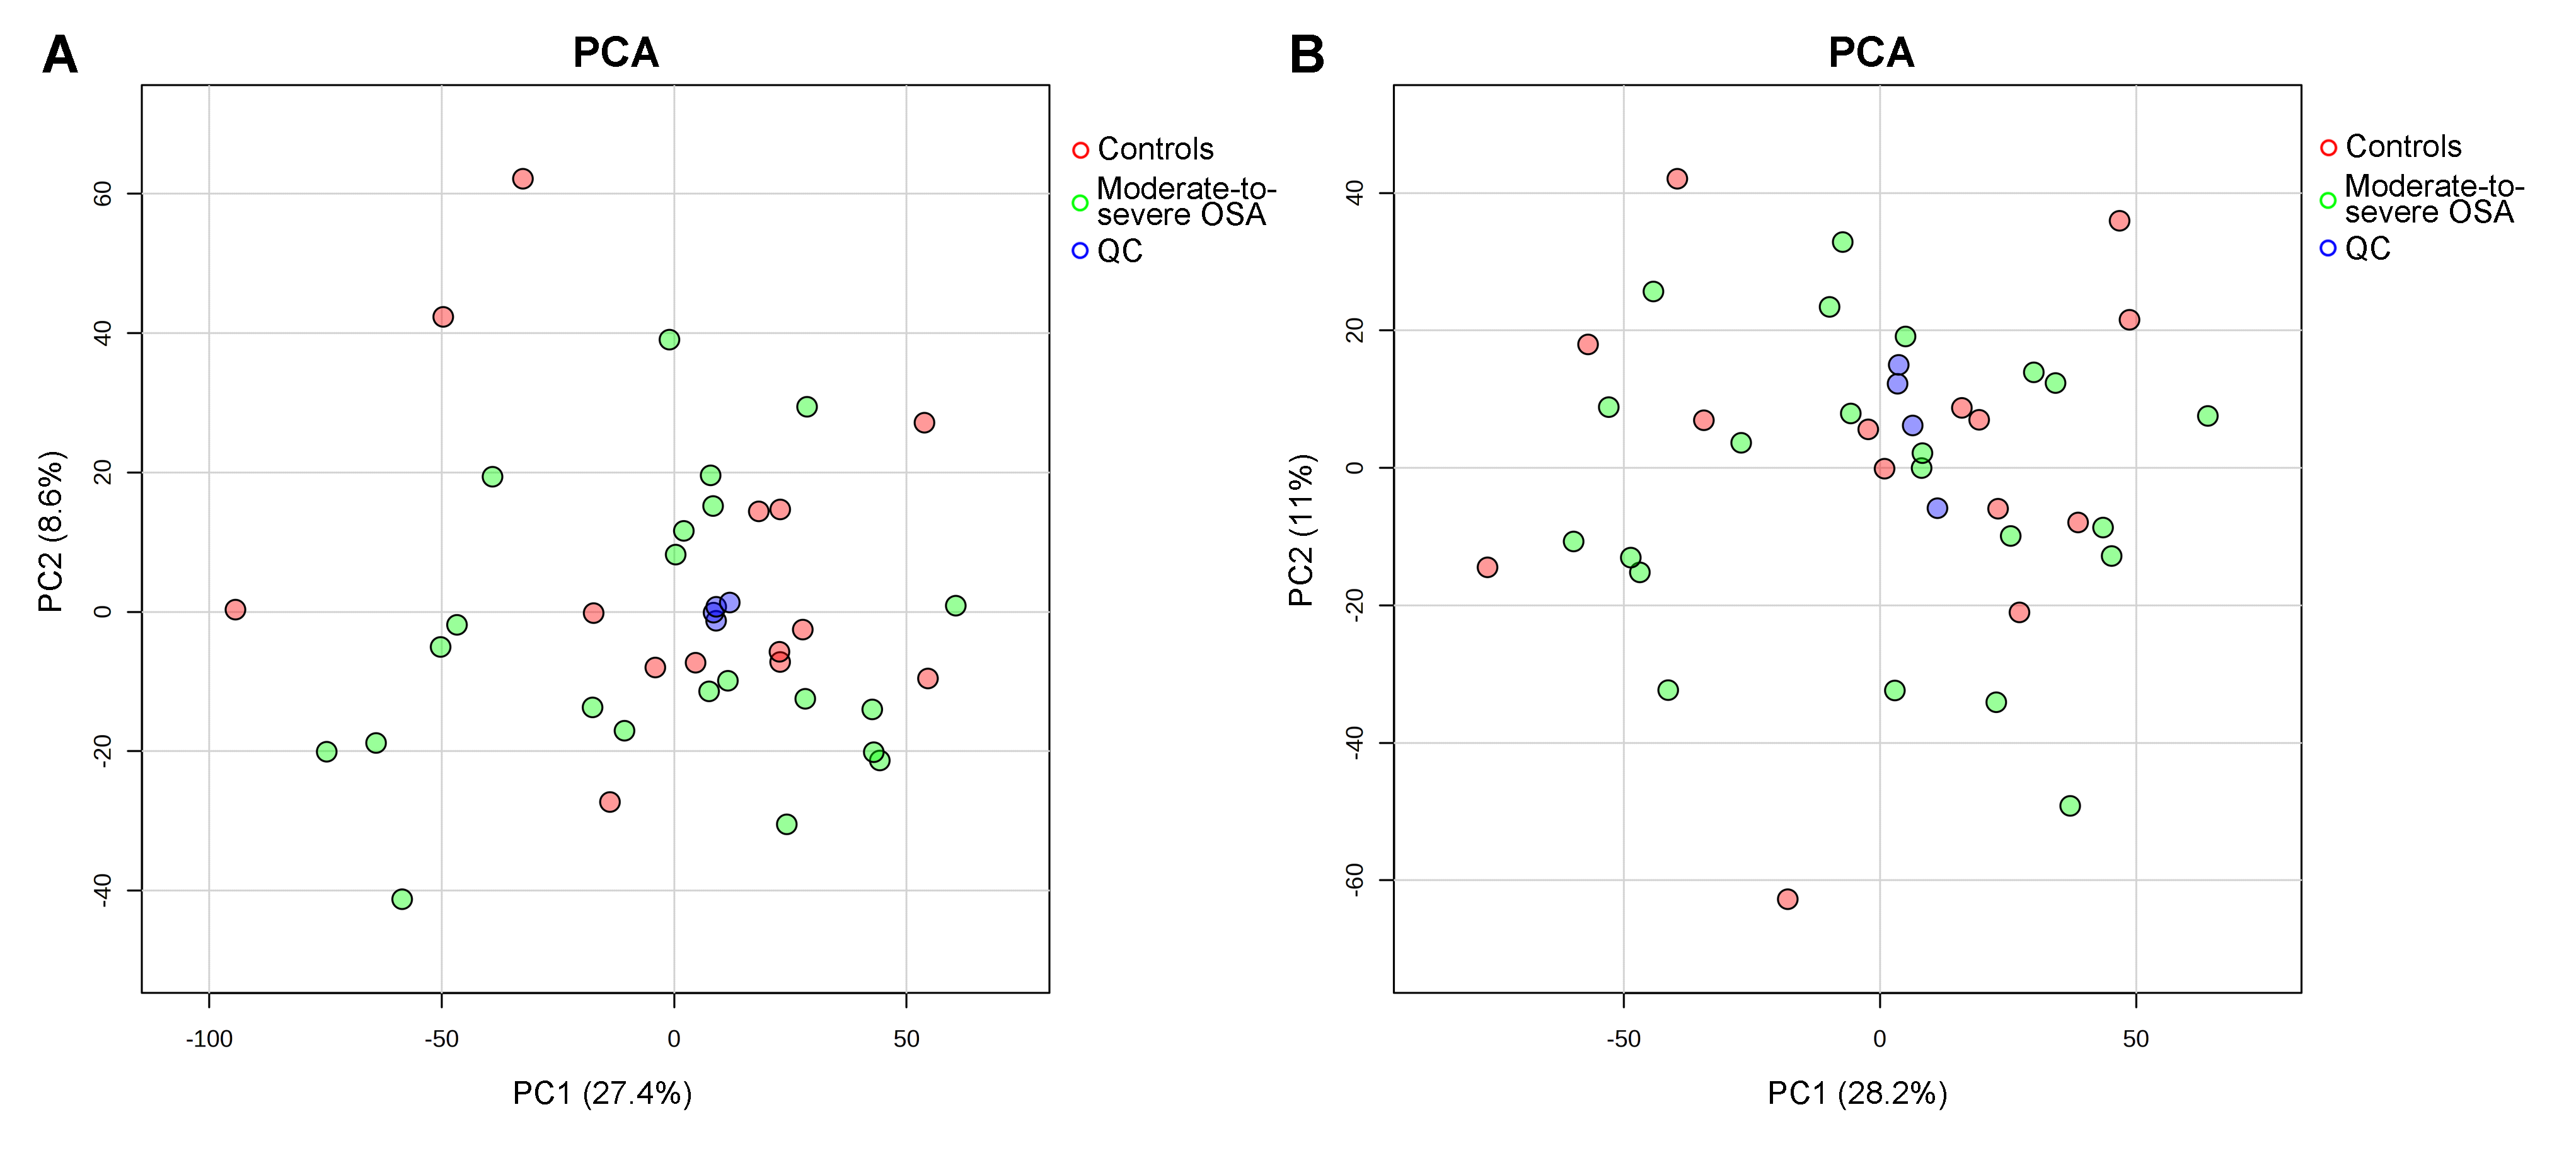
**

**Supplementary Figure S3:** PCA plots for the metabolic profiles from the moderate-to-severe OSA group, controls, and QC samples in the negative-ion (A) and positive-ion modes (B).

**Abbreviations**: OSA, obstructive sleep apnea; PCA, principal component analysis; QC, quality control.
